# Supplementary material
Source: PubMed Central journal article supplement (PMC7173818)
Supplement: mmc1.pdf [file mmc1.pdf]

# THE LANCET

## Child & Adolescent Health

### Supplementary appendix

This appendix formed part of the original submission and has been peer reviewed. We post it as supplied by the authors.

Supplement to: Goldman PS, van Ijzendoorn MH, Sonuga-Barke EJS, on behalf of the Lancet Institutional Care Reform Commission Group. The implications of COVID-19 for the care of children living in residential institutions. *Lancet Child Adolesc Health* 2020; published online April 21. [https://doi.org/10.1016/S2352-4642\(20\)30130-9](https://doi.org/10.1016/S2352-4642(20)30130-9).

Philip S Goldman (Maestral International, USA), Marinus H van Ijzendoorn (University of Cambridge, UK), Marian J Bakermans-Kranenburg (Vrije Universiteit Amsterdam, The Netherlands) Beth Bradford (Changing the Way We Care Global, USA), Alex Christopoulos (Lumos, UK), Christopher Cuthbert (Lumos, UK), Robbie Duchinsky (University of Cambridge, UK), Nathan A Fox (University of Maryland, USA) Stela Grigoras (UNICEF, USA) Megan R Gunnar (University of Minnesota, USA), Rawan W Ibrahim (German Jordanian University, Jordan), Dana Johnson (University of Minnesota, USA), Santi Kusumaningrum (University of Indonesia, Indonesia), Patricia Lim Ah Ken (Changing the Way We Care Global USA), Frederick M Mwangangi (Catholic Relief Services, Kenya), Charles A Nelson III (Harvard Medical School, USA), Ellie M Ott (University of Oxford, UK) Sopihe Reijman (University of Cambridge, UK) Charles H Zeanah (Tulane University School of Medicine, USA) & Edmund J S Sonuga-Barke (King's College London, UK).
